# Supplementary material for: The absorption spectrum of water near 750 nm by CW-CRDS: contribution to the search of water dimer absorption
Source: Royal Society of Chemistry journal article supplement (doi:10.1039/b502172c), 2005-01-01
Supplement: b502172c.pdf [file b502172c.pdf]

Line list of the transitions of H2O recorded by CW-CRDS between 13312.4 and 13377.7 cm-1:

The observed positions and intensities are followed by the SP calculated intensities, the species and the rovibrational assignment.

| FREQUENCY<br>OBSERVED<br>cm-1 | INTENSITY    |                | VIB     | UPPER |    |    | LOWER |    |    | VIB |
|-------------------------------|--------------|----------------|---------|-------|----|----|-------|----|----|-----|
|                               | OBS.<br>cm-2 | CALC.<br>atm-1 |         | J     | Ka | Kc | J     | Ka | Kc |     |
| 13312.4356                    | 3.00E-08     | 3.00E-08       | 400     | 6     | 1  | 6  | 7     | 4  | 3  | 000 |
| 13312.5109                    | 1.77E-09     | 5.10E-09       | 042     | 7     | 4  | 4  | 8     | 5  | 3  | 000 |
| 13312.6444                    | 8.85E-09     | 1.60E-08       | 141     | 5     | 2  | 3  | 6     | 0  | 6  | 000 |
| 13312.8784                    | 3.74E-09     |                |         |       |    |    |       |    |    |     |
| 13312.0013                    | 2.84E-08     | 6.50E-08       | 141     | 2     | 1  | 2  | 1     | 1  | 1  | 000 |
| 13313.2510                    | 5.51E-07     | 3.20E-07       | 141     | 3     | 2  | 2  | 3     | 2  | 1  | 000 |
|                               |              | 3.30E-07       | 240     | 5     | 1  | 5  | 4     | 0  | 4  | 000 |
| 13313.4923                    | 6.49E-09     | 4.40E-09       | 061     | 11    | 6  | 5  | 12    | 6  | 6  | 000 |
| 13313.7200                    | 8.52E-09     | 8.10E-09       | 320     | 10    | 3  | 7  | 11    | 4  | 8  | 000 |
| 13313.7611                    | 1.30E-08     | 3.10E-08       | 240     | 5     | 2  | 3  | 5     | 1  | 4  | 000 |
| 13314.0151                    | 4.49E-08     | 9.10E-08       | 240     | 3     | 2  | 1  | 3     | 1  | 2  | 000 |
| 13314.4098                    | 3.21E-09     | 4.40E-09       | 301     | 10    | 1  | 9  | 10    | 5  | 6  | 000 |
| 13314.8780                    | 9.32E-08     | 9.40E-08       | 301     | 6     | 0  | 6  | 7     | 4  | 3  | 000 |
| 13315.1307                    | 3.48E-08     | 3.20E-08       | 221     | 4     | 3  | 2  | 5     | 5  | 1  | 000 |
| 13315.2375                    | 1.74E-07     | 3.40E-07       | 240     | 6     | 0  | 6  | 5     | 1  | 5  | 000 |
| 13315.2978                    | 2.54E-07     | 2.30E-07       | 221     | 5     | 1  | 5  | 6     | 3  | 4  | 000 |
| 13315.3477                    | 2.09E-08     | 1.20E-08       | 042     | 7     | 4  | 3  | 8     | 5  | 4  | 000 |
| 13315.6841                    | 2.84E-08     | 2.20E-08       | 042     | 5     | 3  | 3  | 6     | 4  | 2  | 000 |
| 13316.2128                    | 1.12E-07     | 1.00E-07       | 221     | 4     | 3  | 1  | 5     | 5  | 0  | 000 |
| 13316.2703                    | 2.83E-09     | 2.60E-09       | 301     | 7     | 1  | 7  | 7     | 5  | 2  | 000 |
| 13316.5413                    | 2.35E-09     |                |         |       |    |    |       |    |    |     |
| 13316.8364                    | 1.61E-08     | 1.40E-08       | 240     | 9     | 4  | 5  | 10    | 3  | 8  | 000 |
| 13317.7680                    | 4.16E-09     | 4.10E-09       | HDO_023 | 3     | 1  | 3  | 2     | 1  | 2  | 000 |
| 13318.1777                    | 7.95E-08     | 6.80E-08       | 400     | 8     | 1  | 8  | 9     | 2  | 7  | 000 |
| 13318.2218                    | 5.85E-09     | 8.50E-09       | 320     | 8     | 4  | 4  | 9     | 5  | 5  | 000 |
| 13318.4622                    | 1.56E-08     | 1.00E-08       | 301     | 10    | 8  | 2  | 11    | 8  | 3  | 000 |
|                               |              | 3.60E-09       | 301     | 10    | 8  | 3  | 11    | 8  | 4  | 000 |
| 13318.5066                    | 4.83E-09     |                |         |       |    |    |       |    |    |     |
| 13319.0426                    | 1.75E-08     | 1.60E-08       | 221     | 12    | 2  | 11 | 13    | 2  | 12 | 000 |
| 13319.2697                    | 7.68E-08     | 5.80E-08       | 221     | 12    | 1  | 11 | 13    | 1  | 12 | 000 |
| 13319.3240                    | 1.41E-07     | 2.40E-07       | 141     | 2     | 2  | 1  | 2     | 2  | 0  | 000 |
| 13319.3977                    | 2.80E-07     | 2.30E-07       | 042     | 5     | 3  | 2  | 6     | 4  | 3  | 000 |
| 13319.4683                    | 8.36E-08     | 7.10E-08       | 400     | 7     | 6  | 1  | 8     | 7  | 2  | 000 |
| 13319.6415                    | 3.40E-08     | 2.80E-08       | 141     | 2     | 2  | 0  | 3     | 0  | 3  | 000 |
| 13319.7562                    | 4.49E-09     | 4.80E-09       | 221     | 6     | 0  | 6  | 6     | 4  | 3  | 000 |
| 13319.8017                    | 1.25E-08     | 2.50E-08       | 240     | 2     | 2  | 0  | 2     | 1  | 1  | 000 |
| 13320.0505                    | 4.35E-09     | 6.60E-09       | 061     | 6     | 6  | 0  | 7     | 6  | 1  | 000 |
| 13320.3210                    | 4.76E-09     | 3.90E-09       | 301     | 12    | 5  | 8  | 13    | 5  | 9  | 000 |
| 13320.5316                    | 4.33E-09     | 4.50E-09       | 221     | 12    | 4  | 9  | 13    | 4  | 10 | 000 |
| 13320.6409                    | 3.90E-08     | 8.10E-08       | 141     | 3     | 0  | 3  | 2     | 0  | 2  | 000 |
| 13320.8992                    | 2.45E-08     | 2.60E-08       | 301     | 8     | 0  | 8  | 9     | 2  | 7  | 000 |
| 13321.0373                    | 3.30E-09     |                |         |       |    |    |       |    |    |     |
| 13321.4992                    | 4.91E-07     | 7.40E-07       | 141     | 2     | 2  | 0  | 2     | 2  | 1  | 000 |
| 13321.5923                    | 1.28E-08     | 4.70E-09       | HDO_023 | 3     | 0  | 3  | 2     | 0  | 2  | 000 |

|            |          |            |         |    |   |    |    |   |    |     |
|------------|----------|------------|---------|----|---|----|----|---|----|-----|
| 13321.7355 | 2.37E-09 |            |         |    |   |    |    |   |    |     |
| 13322.0529 | 6.27E-08 | 3.10E-08   | 221     | 12 | 2 | 10 | 13 | 2 | 11 | 000 |
|            |          | 3.50E-08   | 141     | 5  | 4 | 1  | 6  | 4 | 2  | 000 |
| 13322.2491 | 1.01E-08 | 1.10E-08   | 042     | 10 | 3 | 8  | 11 | 2 | 9  | 000 |
| 13322.5475 | 1.93E-08 | 2.20E-08   | 240     | 11 | 3 | 8  | 12 | 2 | 11 | 000 |
| 13322.6798 | 2.95E-07 | 2.90E-07   | 221     | 6  | 2 | 4  | 7  | 4 | 3  | 000 |
| 13322.8308 | 3.08E-09 | 3.00E-09   | 122     | 7  | 3 | 5  | 8  | 6 | 2  | 000 |
| 13322.9512 | 9.01E-09 | 9.40E-09   | 240     | 12 | 4 | 9  | 13 | 3 | 10 | 000 |
| 13323.2028 | 4.87E-09 | 5.30E-09   | 061     | 7  | 5 | 3  | 7  | 5 | 2  | 000 |
| 13323.4814 | 8.61E-08 | 1.30E-07   | 141     | 3  | 2 | 1  | 3  | 2 | 2  | 000 |
| 13323.7812 | 8.06E-09 | 1.8E-09 BL | HDO_023 | 3  | 2 | 2  | 2  | 2 | 1  | 000 |
| 13324.2145 | 4.52E-07 | 7.90E-07   | 240     | 6  | 1 | 6  | 5  | 0 | 5  | 000 |
| 13324.3110 | 1.51E-08 | 1.50E-08   | 061     | 5  | 5 | 1  | 5  | 5 | 0  | 000 |
|            |          | 5.30E-09   | 061     | 5  | 5 | 0  | 5  | 5 | 1  | 000 |
| 13324.3605 | 9.95E-09 | 9.40E-09   | 061     | 6  | 5 | 1  | 6  | 5 | 2  | 000 |
| 13324.7828 | 1.98E-07 | 2.20E-07   | 141     | 5  | 4 | 2  | 6  | 4 | 3  | 000 |
| 13325.5489 | 1.01E-07 | 1.60E-07   | 061     | 7  | 3 | 5  | 6  | 1 | 6  | 000 |
| 13325.8789 | 7.98E-09 | 5.40E-09   | 320     | 11 | 1 | 11 | 12 | 0 | 12 | 000 |
| 13326.1954 | 3.97E-08 | 7.50E-08   | 141     | 4  | 1 | 3  | 4  | 1 | 4  | 000 |
| 13326.3048 | 1.38E-08 | 1.40E-08   | 320     | 11 | 0 | 11 | 12 | 1 | 12 | 000 |
| 13326.8892 | 1.29E-07 | 1.80E-07   | 240     | 5  | 1 | 4  | 4  | 2 | 3  | 000 |
| 13326.9480 | 1.08E-07 | 1.20E-07   | 141     | 8  | 5 | 3  | 9  | 5 | 4  | 000 |
| 13327.0382 | 1.00E-07 | 2.20E-07   | 141     | 2  | 1 | 1  | 1  | 1 | 0  | 000 |
| 13327.0798 | 1.14E-08 | 1.40E-08   | 221     | 11 | 3 | 8  | 12 | 3 | 9  | 000 |
| 13327.1352 | 4.46E-09 |            |         |    |   |    |    |   |    |     |
| 13327.2733 | 3.18E-08 | 3.90E-08   | 141     | 6  | 2 | 4  | 7  | 0 | 7  | 000 |
| 13327.8273 | 4.57E-09 | 3.00E-09   | 400     | 9  | 3 | 7  | 9  | 6 | 4  | 000 |
| 13327.9852 | 7.92E-08 | 1.20E-07   | 141     | 4  | 2 | 2  | 4  | 2 | 3  | 000 |
| 13328.0213 | 9.31E-09 | 1.50E-08   | 221     | 11 | 4 | 7  | 12 | 4 | 8  | 000 |
| 13328.2498 | 4.00E-09 | 4.60E-09   | 320     | 11 | 3 | 9  | 12 | 2 | 10 | 000 |
| 13328.3339 | 2.75E-09 | 2.70E-09   | 240     | 8  | 2 | 6  | 9  | 1 | 9  | 000 |
| 13328.4774 | 1.64E-08 | 1.60E-08   | 141     | 10 | 7 | 3  | 11 | 7 | 4  | 000 |
| 13328.5388 | 4.65E-09 | 5.20E-09   | 141     | 10 | 7 | 4  | 11 | 7 | 5  | 000 |
| 13328.8164 | 1.82E-09 |            |         |    |   |    |    |   |    |     |
| 13329.2497 | 5.64E-09 | 4.60E-09   | HDO_023 | 4  | 1 | 4  | 3  | 1 | 3  | 000 |
| 13329.3410 | 3.60E-09 | 3.70E-09   | HDO_023 | 3  | 1 | 2  | 2  | 1 | 1  | 000 |
| 13329.4366 | 4.33E-09 | 6.00E-09   | 231     | 7  | 1 | 7  | 8  | 1 | 8  | 010 |
| 13329.7432 | 8.36E-08 | 3.90E-08   | 141     | 8  | 3 | 5  | 9  | 1 | 8  | 000 |
|            |          | 4.20E-08   | 141     | 8  | 5 | 4  | 9  | 5 | 5  | 000 |
| 13329.9122 | 2.09E-07 | 3.90E-07   | 240     | 7  | 0 | 7  | 6  | 1 | 6  | 000 |
| 13330.1047 | 9.43E-08 | 2.30E-07   | 141     | 3  | 1 | 3  | 2  | 1 | 2  | 000 |
| 13330.7041 | 2.75E-08 | 4.00E-08   | 240     | 5  | 2 | 3  | 4  | 3 | 2  | 000 |
| 13331.1942 | 2.16E-09 | 4.20E-09   | 122     | 8  | 3 | 5  | 9  | 6 | 4  | 000 |
| 13331.3168 | 2.16E-07 | 2.30E-07   | 301     | 7  | 3 | 5  | 8  | 5 | 4  | 000 |
| 13331.3957 | 2.20E-08 | 1.90E-08   | 400     | 11 | 4 | 7  | 12 | 5 | 8  | 000 |
| 13331.6368 | 5.56E-08 | 6.10E-08   | 320     | 9  | 3 | 6  | 10 | 4 | 7  | 000 |
| 13331.7128 | 7.30E-08 | 9.00E-08   | 141     | 6  | 3 | 3  | 7  | 1 | 6  | 000 |
| 13331.8719 | 1.55E-08 | 1.80E-08   | 320     | 7  | 3 | 5  | 8  | 4 | 4  | 000 |
| 13331.9885 | 1.04E-08 | 9.80E-09   | 320     | 9  | 5 | 5  | 10 | 6 | 4  | 000 |
| 13332.2021 | 3.68E-09 | 4.90E-09   | 240     | 10 | 5 | 6  | 11 | 4 | 7  | 000 |
| 13332.3924 | 4.17E-08 | 7.00E-08   | 061     | 4  | 4 | 0  | 4  | 2 | 3  | 000 |
| 13332.5920 | 9.32E-09 | 1.20E-08   | 160     | 6  | 4 | 2  | 5  | 3 | 3  | 000 |
| 13332.6618 | 1.96E-09 | 6.00E-09   | 240     | 8  | 4 | 4  | 9  | 3 | 7  | 000 |
| 13332.9519 | 2.28E-08 | 4.50E-08   | 240     | 9  | 1 | 9  | 8  | 0 | 8  | 000 |
| 13333.0699 | 5.15E-09 | 7.00E-09   | 061     | 5  | 4 | 1  | 5  | 2 | 4  | 000 |

|            |          |          |         |    |   |    |    |   |    |     |
|------------|----------|----------|---------|----|---|----|----|---|----|-----|
| 13333.1622 | 4.01E-09 | 4.90E-09 | HDO_023 | 4  | 0 | 4  | 3  | 0 | 3  | 000 |
| 13333.7351 | 1.86E-08 | 2.20E-08 | 301     | 9  | 2 | 7  | 10 | 4 | 6  | 000 |
| 13334.2967 | 2.92E-09 |          |         |    |   |    |    |   |    |     |
| 13334.5863 | 2.64E-08 | 3.10E-08 | 320     | 9  | 5 | 4  | 10 | 6 | 5  | 000 |
| 13334.6809 | 1.25E-07 | 1.20E-07 | 301     | 8  | 3 | 5  | 9  | 5 | 4  | 000 |
|            |          | 5.90E-08 | 240     | 2  | 2 | 1  | 2  | 1 | 2  | 000 |
| 13335.1558 | 4.91E-09 | 9.80E-09 | 090     | 7  | 3 | 4  | 8  | 6 | 3  | 000 |
| 13335.1887 | 9.92E-08 | 1.60E-07 | 240     | 7  | 1 | 7  | 6  | 0 | 6  | 000 |
| 13335.2465 | 2.78E-09 | 5.80E-09 | 080     | 6  | 5 | 2  | 7  | 0 | 7  | 000 |
| 13335.3508 | 1.05E-07 | 1.10E-07 | 320     | 7  | 5 | 2  | 8  | 6 | 3  | 000 |
| 13335.8131 | 3.02E-09 |          |         |    |   |    |    |   |    |     |
| 13336.1859 | 3.19E-09 | 3.40E-09 | 221     | 12 | 1 | 12 | 12 | 1 | 11 | 000 |
| 13336.3447 | 8.61E-09 | 1.00E-08 | 221     | 12 | 0 | 12 | 12 | 2 | 11 | 000 |
| 13336.9368 | 3.95E-09 |          |         |    |   |    |    |   |    |     |
| 13337.2913 | 3.35E-09 | 3.90E-09 | 231     | 7  | 0 | 7  | 8  | 0 | 8  | 010 |
| 13337.5810 | 4.36E-09 |          |         |    |   |    |    |   |    |     |
| 13337.7063 | 1.11E-08 | 1.40E-08 | 122     | 7  | 1 | 7  | 8  | 4 | 4  | 000 |
| 13337.9536 | 6.19E-09 | 6.30E-09 | 240     | 12 | 4 | 8  | 13 | 3 | 11 | 000 |
|            |          | 2.60E-09 | HDO_023 | 4  | 2 | 3  | 3  | 2 | 2  |     |
| 13338.2381 | 3.82E-08 | 4.60E-08 | 320     | 7  | 5 | 3  | 8  | 6 | 2  | 000 |
| 13338.3567 | 7.09E-08 | 1.90E-07 | 141     | 4  | 0 | 4  | 3  | 0 | 3  | 000 |
| 13338.5760 | 1.14E-07 | 1.20E-07 | 221     | 11 | 0 | 11 | 12 | 0 | 12 | 000 |
| 13338.7886 | 3.18E-07 | 3.50E-07 | 221     | 11 | 1 | 11 | 12 | 1 | 12 | 000 |
| 13339.6673 | 6.27E-08 | 1.10E-07 | 240     | 8  | 0 | 8  | 7  | 1 | 7  | 000 |
| 13339.7528 | 3.43E-09 | 4.50E-09 | HDO_023 | 5  | 1 | 5  | 4  | 1 | 4  | 000 |
| 13340.2488 | 3.65E-09 | 6.20E-09 | 061     | 6  | 4 | 2  | 6  | 2 | 5  | 000 |
| 13340.4603 | 8.15E-09 | 1.10E-08 | 141     | 9  | 3 | 6  | 10 | 1 | 9  | 000 |
| 13340.5807 | 1.27E-07 | 1.50E-07 | 301     | 5  | 4 | 2  | 6  | 6 | 1  | 000 |
| 13340.8880 | 4.22E-08 | 4.90E-08 | 301     | 5  | 4 | 1  | 6  | 6 | 0  | 000 |
| 13341.0780 | 9.59E-09 | 9.00E-09 | 042     | 6  | 4 | 3  | 7  | 5 | 2  | 000 |
| 13341.2626 | 4.35E-09 | 4.90E-09 | 301     | 14 | 2 | 12 | 15 | 2 | 13 | 000 |
| 13341.8751 | 5.09E-07 | 6.20E-07 | 221     | 6  | 1 | 5  | 7  | 3 | 4  | 000 |
| 13342.1450 | 1.50E-08 | 1.90E-08 | 320     | 7  | 4 | 4  | 8  | 5 | 3  | 000 |
| 13342.6201 | 1.18E-08 | 1.50E-08 | 400     | 9  | 3 | 7  | 10 | 4 | 6  | 000 |
| 13342.8103 | 8.97E-09 | 9.70E-09 | 221     | 9  | 2 | 8  | 9  | 4 | 5  | 000 |
| 13343.0039 | 4.17E-09 | 4.60E-09 | HDO_023 | 5  | 0 | 5  | 4  | 0 | 4  | 000 |
| 13343.1331 | 1.71E-08 | 2.30E-08 | 141     | 5  | 2 | 3  | 5  | 2 | 4  | 000 |
| 13343.3179 | 1.19E-07 | 1.40E-07 | 221     | 5  | 2 | 3  | 6  | 4 | 2  | 000 |
| 13344.0176 | 2.58E-08 | 3.20E-08 | 141     | 10 | 4 | 6  | 11 | 2 | 9  | 000 |
| 13344.2730 | 3.73E-08 | 3.40E-08 | 042     | 4  | 3 | 2  | 5  | 4 | 1  | 000 |
| 13344.5651 | 7.73E-09 | 2.20E-08 | 042     | 6  | 1 | 6  | 6  | 2 | 5  | 000 |
| 13344.6775 | 2.59E-09 | 2.50E-09 | 042     | 4  | 3 | 1  | 5  | 4 | 2  | 000 |
| 13344.9807 | 1.42E-08 | 1.60E-08 | 320     | 6  | 2 | 5  | 7  | 3 | 4  | 000 |
| 13345.0408 | 6.76E-09 | 7.90E-09 | 042     | 12 | 4 | 9  | 13 | 3 | 10 | 000 |
| 13345.4304 | 2.18E-09 | 4.10E-09 | 080     | 7  | 5 | 3  | 8  | 0 | 8  | 000 |
| 13345.5305 | 2.45E-09 | 3.90E-09 | HDO_023 | 4  | 1 | 3  | 3  | 1 | 2  | 000 |
| 13345.6809 | 2.51E-08 | 6.40E-08 | 141     | 4  | 1 | 4  | 3  | 1 | 3  | 000 |
| 13345.7243 | 2.09E-09 | 3.50E-09 | 301     | 9  | 0 | 9  | 9  | 4 | 6  | 000 |
| 13346.2234 | 3.13E-08 | 3.40E-08 | 320     | 11 | 1 | 10 | 12 | 2 | 11 | 000 |
| 13346.4499 | 1.83E-08 | 2.40E-08 | 122     | 7  | 3 | 4  | 8  | 6 | 3  | 000 |
| 13346.6544 | 5.51E-08 | 6.80E-08 | 320     | 7  | 4 | 3  | 8  | 5 | 4  | 000 |
| 13346.9212 | 6.53E-09 | 8.70E-09 | 042     | 9  | 3 | 7  | 10 | 2 | 8  | 000 |
| 13347.1073 | 2.18E-08 | 3.10E-08 | 141     | 5  | 3 | 2  | 6  | 1 | 5  | 000 |
| 13347.3039 | 1.20E-08 |          |         |    |   |    |    |   |    |     |
| 13347.4523 | 1.58E-07 | 2.90E-07 | 240     | 8  | 1 | 8  | 7  | 0 | 7  | 000 |

|            |          |          |         |    |   |    |    |   |    |     |
|------------|----------|----------|---------|----|---|----|----|---|----|-----|
| 13347.7093 | 1.77E-08 | 2.30E-08 | 221     | 4  | 2 | 3  | 5  | 4 | 2  | 000 |
| 13347.7969 | 2.40E-09 | 3.90E-08 | 240     | 4  | 2 | 3  | 4  | 1 | 4  | 000 |
| 13347.9551 | 1.08E-08 | 1.80E-08 | 301     | 11 | 5 | 6  | 12 | 5 | 7  | 000 |
| 13348.3045 | 5.14E-08 | 6.20E-08 | 221     | 11 | 1 | 10 | 12 | 1 | 11 | 000 |
| 13348.5369 | 3.38E-08 | 4.20E-08 | 221     | 10 | 6 | 4  | 11 | 6 | 5  | 000 |
| 13348.6027 | 2.78E-08 | 3.70E-08 | 320     | 8  | 3 | 5  | 9  | 4 | 6  | 000 |
| 13348.9697 | 1.19E-07 | 2.10E-07 | 141     | 4  | 4 | 0  | 5  | 4 | 1  | 000 |
| 13349.2169 | 1.50E-08 | 1.50E-08 | 141     | 7  | 3 | 5  | 7  | 3 | 4  | 000 |
| 13349.4561 | 1.04E-07 | 1.90E-07 | 240     | 9  | 0 | 9  | 8  | 1 | 8  | 000 |
| 13349.5069 | 2.70E-08 | 2.90E-08 | 400     | 9  | 4 | 6  | 10 | 5 | 5  | 000 |
| 13349.5609 | 6.45E-08 | 7.00E-08 | 240     | 10 | 1 | 10 | 9  | 0 | 9  | 000 |
| 13349.9268 | 6.16E-09 |          |         |    |   |    |    |   |    |     |
| 13350.2393 | 2.56E-07 | 1.60E-07 | 141     | 4  | 4 | 1  | 5  | 4 | 2  | 000 |
|            |          | 4.20E-08 | 122     | 10 | 2 | 9  | 11 | 3 | 8  | 000 |
| 13350.3509 | 3.60E-08 | 2.80E-08 | 320     | 5  | 1 | 5  | 6  | 2 | 4  | 000 |
| 13350.5803 | 1.25E-08 | 1.90E-08 | 141     | 5  | 1 | 4  | 5  | 1 | 5  | 000 |
| 13350.6956 | 1.50E-08 | 1.40E-08 | 400     | 8  | 3 | 6  | 8  | 6 | 3  | 000 |
| 13350.9949 | 3.73E-08 | 2.60E-08 | 221     | 11 | 2 | 9  | 12 | 2 | 10 | 000 |
| 13351.3854 | 8.12E-09 | 3.30E-09 | 151     | 6  | 4 | 2  | 7  | 2 | 5  | 010 |
|            |          | 2.60E-09 | HDO_023 | 5  | 2 | 4  | 4  | 2 | 3  | 000 |
| 13351.5063 | 4.60E-09 | 7.80E-09 | 042     | 6  | 0 | 6  | 6  | 1 | 5  | 000 |
| 13351.5666 | 2.80E-09 | 3.90E-09 | HDO_023 | 6  | 0 | 6  | 5  | 0 | 5  | 000 |
| 13352.2789 | 1.22E-08 | 1.20E-08 | 231     | 6  | 1 | 5  | 7  | 1 | 6  | 010 |
| 13352.4077 | 3.79E-09 | 3.10E-09 | 320     | 9  | 2 | 7  | 9  | 5 | 4  | 000 |
| 13352.6368 | 1.61E-08 | 1.40E-08 | 160     | 7  | 4 | 3  | 6  | 3 | 4  | 000 |
| 13352.7406 | 5.94E-08 | 8.30E-08 | 141     | 3  | 1 | 2  | 2  | 1 | 1  | 000 |
| 13352.7960 | 1.29E-07 | 5.80E-08 | 400     | 6  | 6 | 1  | 7  | 7 | 0  | 000 |
|            |          | 1.90E-08 | 400     | 6  | 6 | 0  | 7  | 7 | 1  | 000 |
|            |          | 3.20E-08 | 240     | 7  | 4 | 3  | 8  | 3 | 6  | 000 |
| 13352.9218 | 1.07E-08 | 2.00E-08 | 080     | 10 | 4 | 6  | 9  | 1 | 9  | 000 |
| 13353.2905 | 9.89E-09 | 9.90E-09 | 141     | 7  | 2 | 5  | 8  | 0 | 8  | 000 |
| 13353.5822 | 4.20E-09 | 3.40E-08 | 160     | 4  | 4 | 1  | 4  | 1 | 4  | 000 |
| 13353.6620 | 1.05E-07 | 5.20E-08 | 221     | 11 | 4 | 8  | 12 | 4 | 9  | 000 |
|            |          | 3.80E-08 | 141     | 10 | 3 | 7  | 11 | 1 | 10 | 000 |
| 13353.7090 | 4.35E-09 | 7.30E-09 | 240     | 13 | 0 | 13 | 12 | 1 | 12 | 000 |
| 13354.4225 | 2.31E-08 | 3.30E-08 | 141     | 5  | 0 | 5  | 4  | 0 | 4  | 000 |
| 13354.6165 | 6.95E-08 | 6.20E-08 | 221     | 11 | 3 | 9  | 12 | 3 | 10 | 000 |
| 13354.6915 | 2.97E-08 | 2.60E-08 | 320     | 7  | 0 | 7  | 7  | 3 | 4  | 000 |
| 13354.8066 | 1.22E-08 | 2.20E-08 | 240     | 12 | 1 | 12 | 11 | 0 | 11 | 000 |
| 13354.9459 | 2.02E-08 | 1.80E-08 | 400     | 10 | 4 | 6  | 11 | 5 | 7  | 000 |
| 13355.0662 | 2.97E-09 |          |         |    |   |    |    |   |    |     |
| 13355.1529 | 2.77E-09 | 2.80E-09 | 240     | 12 | 5 | 7  | 13 | 4 | 10 | 000 |
| 13355.8444 | 1.72E-08 | 6.10E-09 | 400     | 5  | 2 | 3  | 6  | 5 | 2  | 000 |
|            |          | 6.90E-09 | 122     | 7  | 2 | 6  | 8  | 5 | 3  | 000 |
| 13356.2350 | 3.14E-09 | 3.10E-09 | 240     | 10 | 5 | 6  | 10 | 6 | 5  | 000 |
| 13356.8593 | 9.21E-08 | 8.90E-08 | 141     | 7  | 5 | 2  | 8  | 5 | 3  | 000 |
| 13357.1417 | 2.04E-07 | 1.50E-07 | 221     | 11 | 2 | 10 | 12 | 2 | 11 | 000 |
| 13357.1837 | 1.82E-07 | 1.30E-07 | 221     | 10 | 3 | 7  | 11 | 3 | 8  | 000 |
| 13357.3471 | 5.45E-09 | 6.50E-09 | 122     | 6  | 3 | 4  | 7  | 6 | 1  | 000 |
| 13357.4230 | 8.18E-09 | 6.30E-09 | 023     | 7  | 2 | 6  | 8  | 6 | 3  | 000 |
| 13357.7503 | 2.48E-07 | 2.40E-07 | 141     | 7  | 5 | 3  | 8  | 5 | 4  | 000 |
| 13357.9693 | 1.90E-08 | 2.30E-08 | 320     | 10 | 0 | 10 | 11 | 1 | 11 | 000 |
| 13358.1651 | 4.68E-08 | 5.80E-08 | 240     | 6  | 1 | 5  | 5  | 2 | 4  | 000 |
| 13358.3399 | 4.19E-08 | 3.10E-08 | 301     | 9  | 8 | 2  | 10 | 8 | 3  | 000 |
|            |          | 1.00E-08 | 301     | 9  | 8 | 1  | 10 | 8 | 2  | 000 |

|            |          |          |           |    |    |    |    |   |    |     |
|------------|----------|----------|-----------|----|----|----|----|---|----|-----|
|            |          | 5.80E-08 | 240       | 6  | 1  | 5  | 5  | 2 | 4  | 000 |
| 13358.6575 | 1.43E-07 | 1.40E-07 | 400       | 7  | 1  | 6  | 8  | 4 | 5  | 000 |
| 13358.7913 | 2.75E-08 | 3.80E-08 | 320       | 10 | 1  | 10 | 11 | 0 | 11 | 000 |
|            |          | 1.30E-08 | 240       | 5  | 2  | 4  | 5  | 1 | 5  | 000 |
| 13359.3916 | 5.51E-09 | 5.80E-09 | 301       | 9  | 1  | 8  | 9  | 5 | 5  | 000 |
| 13359.5816 | 4.76E-08 | 4.60E-08 | 023       | 11 | 1  | 11 | 12 | 3 | 10 | 000 |
| 13359.6673 | 1.25E-07 | 1.20E-07 | 221       | 5  | 0  | 5  | 6  | 2 | 4  | 000 |
| 13359.7938 | 7.24E-08 | 7.30E-08 | 301       | 7  | 3  | 4  | 8  | 5 | 3  | 000 |
| 13359.8533 | 6.16E-08 | 1.30E-07 | 141       | 5  | 1  | 5  | 4  | 1 | 4  | 000 |
| 13360.1362 | 9.84E-09 |          |           |    |    |    |    |   |    |     |
| 13360.3143 | 1.77E-08 | 1.80E-08 | 141       | 9  | 4  | 5  | 10 | 2 | 8  | 000 |
| 13360.6068 | 2.69E-08 | 3.80E-08 | 141       | 6  | 2  | 4  | 6  | 2 | 5  | 000 |
| 13360.6713 | 3.59E-09 | 3.50E-09 | HDO_023   | 5  | 1  | 4  | 4  | 1 | 3  | 000 |
| 13361.0174 | 6.53E-09 | 5.10E-09 | 032       | 11 | 10 | 2  | 12 | 3 | 9  | 000 |
| 13361.2042 | 1.27E-08 | 1.30E-08 | 301       | 11 | 6  | 6  | 12 | 6 | 7  | 000 |
| 13361.2608 | 3.70E-08 | 2.40E-08 | 240       | 10 | 0  | 10 | 9  | 1 | 9  | 000 |
| 13361.8032 | 2.09E-08 | 3.10E-08 | 042       | 2  | 2  | 1  | 3  | 3 | 0  | 000 |
| 13362.1901 | 5.45E-08 | 3.50E-08 | 141       | 9  | 7  | 3  | 10 | 7 | 4  | 000 |
|            |          | 1.20E-08 | 141       | 9  | 7  | 2  | 10 | 7 | 3  | 000 |
| 13362.8188 | 2.80E-08 | 9.90E-09 | 400       | 4  | 2  | 3  | 5  | 5 | 0  | 000 |
| 13362.8775 | 6.11E-09 |          |           |    |    |    |    |   |    |     |
| 13362.9934 | 1.60E-08 | 1.10E-08 | 042       | 2  | 2  | 0  | 3  | 3 | 1  | 000 |
| 13363.3425 | 1.86E-08 | 2.20E-08 | 231       | 6  | 0  | 6  | 7  | 0 | 7  | 010 |
| 13363.5051 | 1.31E-08 | 1.50E-08 | 301       | 10 | 7  | 3  | 11 | 7 | 4  | 000 |
| 13363.8186 | 3.44E-07 | 4.00E-07 | 221       | 4  | 2  | 2  | 5  | 4 | 1  | 000 |
| 13364.1223 | 2.18E-09 | 5.90E-09 | 240       | 5  | 3  | 3  | 4  | 4 | 0  | 000 |
| 13364.1909 | 7.93E-09 | 6.50E-09 | 301       | 10 | 7  | 4  | 11 | 7 | 5  | 000 |
| 13364.3169 | 1.46E-09 | 1.30E-08 | 042       | 3  | 0  | 3  | 4  | 1 | 4  | 000 |
| 13364.4376 | 6.68E-09 | 7.90E-09 | 240       | 9  | 5  | 4  | 9  | 6 | 3  | 000 |
| 13364.5232 | 3.08E-09 | 3.80E-09 | 080       | 8  | 5  | 4  | 9  | 0 | 9  | 000 |
| 13364.6915 | 2.32E-09 | 2.50E-09 | 240       | 9  | 5  | 5  | 9  | 6 | 4  | 000 |
| 13364.7349 | 1.08E-07 | 1.20E-07 | 221       | 4  | 1  | 4  | 5  | 3 | 3  | 000 |
| 13364.8550 | 3.56E-09 | 5.50E-09 | 301       | 14 | 2  | 13 | 15 | 2 | 14 | 000 |
| 13364.9639 | 6.49E-09 |          | H2O18_221 | 9  | 1  | 9  | 10 | 1 | 10 | 000 |
| 13365.0300 | 1.11E-08 | 1.20E-08 | 301       | 12 | 4  | 8  | 13 | 4 | 9  | 000 |
| 13365.1515 | 1.58E-07 | 1.80E-07 | 221       | 10 | 4  | 6  | 11 | 4 | 7  | 000 |
| 13365.1917 | 1.28E-08 | 1.80E-08 | 301       | 14 | 1  | 13 | 15 | 1 | 14 | 000 |
| 13365.3403 | 7.41E-08 | 7.90E-08 | 320       | 8  | 5  | 4  | 9  | 6 | 3  | 000 |
| 13365.4919 | 3.38E-08 | 3.70E-08 | 042       | 8  | 3  | 6  | 9  | 2 | 7  | 000 |
| 13365.5314 | 6.97E-09 | 1.50E-08 | 240       | 5  | 3  | 2  | 4  | 4 | 1  | 000 |
| 13366.0410 | 2.02E-07 | 2.00E-07 | 301       | 7  | 2  | 6  | 8  | 4 | 5  | 000 |
| 13366.1633 | 1.54E-08 | 8.60E-09 | 320       | 10 | 2  | 8  | 11 | 3 | 9  | 000 |
| 13366.2895 | 2.54E-08 | 2.70E-08 | 320       | 8  | 5  | 3  | 9  | 6 | 4  | 000 |
| 13366.5368 | 1.79E-08 | 3.00E-08 | 240       | 11 | 0  | 11 | 10 | 1 | 10 | 000 |
| 13366.8326 | 1.64E-07 | 1.80E-07 | 400       | 8  | 2  | 7  | 9  | 3 | 6  | 000 |
| 13367.2110 | 1.21E-07 | 1.40E-07 | 400       | 7  | 0  | 7  | 8  | 3 | 6  | 000 |
| 13367.7191 | 2.32E-08 | 2.00E-08 | 301       | 15 | 1  | 15 | 16 | 1 | 16 | 000 |
| 13368.0821 | 1.50E-09 | 3.40E-09 | 320       | 8  | 6  | 3  | 9  | 7 | 2  | 000 |
| 13368.1896 | 3.14E-08 | 3.20E-08 | 141       | 6  | 3  | 4  | 6  | 3 | 3  | 000 |
| 13368.2489 | 4.11E-09 | 3.10E-09 | 141       | 12 | 4  | 8  | 13 | 2 | 11 | 000 |
| 13368.3392 | 1.60E-08 | 9.20E-09 | 061       | 12 | 6  | 6  | 13 | 4 | 9  | 000 |
| 13368.4632 | 3.41E-09 | 4.30E-09 | 400       | 7  | 3  | 5  | 7  | 6 | 2  | 000 |
| 13368.5821 | 4.68E-09 | 6.00E-09 | 080       | 6  | 5  | 2  | 6  | 2 | 5  | 000 |
| 13368.8331 | 4.11E-08 | 6.60E-08 | 141       | 6  | 0  | 6  | 5  | 0 | 5  | 000 |
| 13369.4252 | 1.48E-07 | 1.40E-07 | 301       | 6  | 3  | 4  | 7  | 5 | 3  | 000 |

|            |          |          |           |    |   |    |    |   |    |     |
|------------|----------|----------|-----------|----|---|----|----|---|----|-----|
| 13369.5423 | 1.99E-07 | 2.00E-07 | 320       | 7  | 3 | 4  | 8  | 4 | 5  | 000 |
| 13369.7768 | 1.61E-07 | 1.50E-07 | 320       | 6  | 5 | 2  | 7  | 6 | 1  | 000 |
| 13369.9927 | 1.13E-07 | 1.10E-07 | 301       | 7  | 1 | 7  | 8  | 3 | 6  | 000 |
| 13370.0423 | 7.36E-07 | 7.00E-07 | 221       | 10 | 0 | 10 | 11 | 0 | 11 | 000 |
| 13370.1759 | 4.99E-08 | 6.50E-08 | 141       | 4  | 3 | 1  | 5  | 1 | 4  | 000 |
| 13370.3405 | 2.16E-09 |          | H2O18_221 | 9  | 2 | 8  | 10 | 2 | 9  | 000 |
| 13370.6156 | 7.39E-09 | 5.40E-09 | 231       | 5  | 2 | 3  | 6  | 2 | 4  | 010 |
| 13370.6845 | 2.12E-08 | 4.20E-08 | 160       | 9  | 3 | 7  | 8  | 0 | 8  | 000 |
| 13370.8543 | 2.91E-07 | 3.10E-07 | 221       | 10 | 1 | 10 | 11 | 1 | 11 | 000 |
| 13370.9616 | 3.79E-09 | 4.40E-09 | 400       | 12 | 3 | 9  | 13 | 4 | 10 | 000 |
| 13371.1688 | 3.11E-09 | 1.80E-08 | 240       | 6  | 2 | 5  | 6  | 1 | 6  | 000 |
| 13371.2842 | 9.78E-09 | 1.00E-08 | 221       | 11 | 0 | 11 | 11 | 2 | 10 | 000 |
| 13371.423  | 7.06E-09 | 9.20E-09 | 141       | 11 | 4 | 7  | 12 | 2 | 10 | 000 |
| 13371.4942 | 1.03E-08 | 1.60E-08 | 240       | 8  | 5 | 4  | 8  | 6 | 3  | 000 |
|            |          | 6.70E-09 | 042       | 3  | 3 | 1  | 4  | 4 | 0  | 000 |
| 13371.622  | 6.19E-09 | 5.60E-09 | 240       | 8  | 5 | 3  | 8  | 6 | 2  | 000 |
|            |          | 2.10E-08 | 042       | 3  | 3 | 0  | 4  | 4 | 1  | 000 |
| 13371.8063 | 1.80E-07 | 3.10E-07 | 240       | 2  | 2 | 1  | 1  | 1 | 0  | 000 |
| 13372.0575 | 2.40E-08 | 2.90E-08 | 320       | 6  | 5 | 1  | 7  | 6 | 2  | 000 |
| 13372.1446 | 1.88E-07 | 2.10E-07 | 320       | 10 | 2 | 9  | 11 | 1 | 10 | 000 |
| 13372.8067 | 1.04E-08 | 3.70E-09 | 141       | 6  | 1 | 6  | 5  | 1 | 5  | 000 |
| 13373.5838 | 3.10E-07 | 3.30E-07 | 061       | 10 | 4 | 6  | 11 | 0 | 11 | 000 |
| 13373.6359 | 1.05E-07 | 1.70E-07 | 320       | 6  | 3 | 4  | 7  | 4 | 3  | 000 |
| 13373.6751 | 2.75E-08 | 1.30E-08 | 240       | 11 | 5 | 6  | 12 | 4 | 9  | 000 |
| 13373.9099 | 8.06E-09 | 7.80E-09 | 231       | 5  | 1 | 4  | 6  | 1 | 5  | 010 |
| 13374.5177 | 1.29E-08 | 7.40E-09 | 301       | 13 | 2 | 11 | 14 | 2 | 12 | 000 |
| 13374.6945 | 7.25E-08 | 7.80E-08 | 320       | 6  | 4 | 3  | 7  | 5 | 2  | 000 |
| 13374.8928 | 2.43E-09 | 3.20E-09 | 042       | 7  | 5 | 3  | 8  | 6 | 2  | 000 |
| 13374.9989 | 3.62E-08 | 2.30E-08 | 071       | 6  | 0 | 6  | 7  | 4 | 3  | 000 |
| 13375.4705 | 6.92E-09 | 7.00E-09 | 042       | 7  | 5 | 2  | 8  | 6 | 3  | 000 |
| 13375.8118 | 1.63E-08 | 2.00E-08 | 301       | 13 | 3 | 11 | 14 | 3 | 12 | 000 |
| 13376.0313 | 2.35E-08 | 3.80E-08 | 320       | 6  | 4 | 2  | 7  | 5 | 3  | 000 |
| 13376.0724 | 1.31E-07 | 1.20E-07 | 400       | 9  | 4 | 5  | 10 | 5 | 6  | 000 |
| 13376.1161 | 1.24E-08 | 2.00E-08 | 301       | 5  | 0 | 5  | 6  | 4 | 2  | 000 |
| 13376.2655 | 1.39E-08 | 4.30E-08 | 042       | 5  | 0 | 5  | 5  | 1 | 4  | 000 |
| 13376.3349 | 1.15E-08 | 1.20E-08 | 240       | 6  | 4 | 2  | 7  | 3 | 5  | 000 |
| 13376.6641 | 1.17E-09 |          | H2O18_221 | 8  | 3 | 5  | 9  | 3 | 6  | 000 |
| 13376.8266 | 2.07E-09 | 3.10E-09 | 221       | 4  | 0 | 4  | 4  | 4 | 1  | 000 |
| 13376.945  | 4.52E-08 | 2.90E-08 | 240       | 7  | 5 | 2  | 7  | 6 | 1  | 000 |
| 13377.0719 | 8.86E-09 | 9.50E-09 | 240       | 7  | 5 | 3  | 7  | 6 | 2  | 000 |
| 13377.6667 | 9.31E-08 | 2.30E-07 | 141       | 4  | 1 | 3  | 3  | 1 | 2  | 000 |

16 UNIDENTIFIED LINES
